# Supplementary material for: Formate Is Required for Growth of the Thermophilic Acetogenic Bacterium Thermoanaerobacter kivui Lacking Hydrogen-Dependent Carbon Dioxide Reductase (HDCR)
Source: PubMed Central journal article supplement (PMC7005907; doi:10.3389/fmicb.2020.00059), 2020-01-31
Supplement: Data_Sheet_1.pdf [file Data_Sheet_1.pdf]

*Supplementary Material*

for the manuscript

**Formate Is Required for Growth of the Thermophilic Acetogenic Bacterium *Thermoanaerobacter kivui* Lacking Hydrogen-Dependent Carbon Dioxide Reductase (HDCR)**

by

**Surbhi Jain<sup>1</sup>, Helge M. Dietrich<sup>1</sup>, Volker Müller<sup>1</sup> and Mirko Basen<sup>1,2\*</sup>**

<sup>1</sup>Department of Molecular Microbiology & Bioenergetics, Institute of Molecular Biosciences, Johann Wolfgang Goethe University, Max-von-Laue Str. 9, D-60438 Frankfurt/Main, Germany

<sup>2</sup>Current address: University of Rostock, Institute of Biological Sciences, Albert-Einstein Str. 3, 18059 Rostock, Germany

**\* Correspondence:**

Mirko Basen  
mirko.basen@uni-rostock.de

**1 Supplementary Figures and Tables**

**1.1 Supplementary Figures**

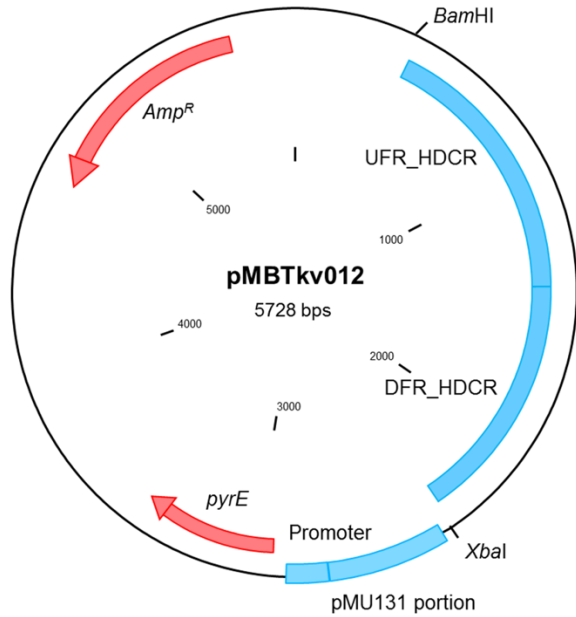

**Supplementary Figure 1.** Plasmid pMBTk012. UFR, upstream flanking region; DFR, downstream flanking region; HDCR, genome region encoding the hydrogen-dependent carbon dioxide reductase.

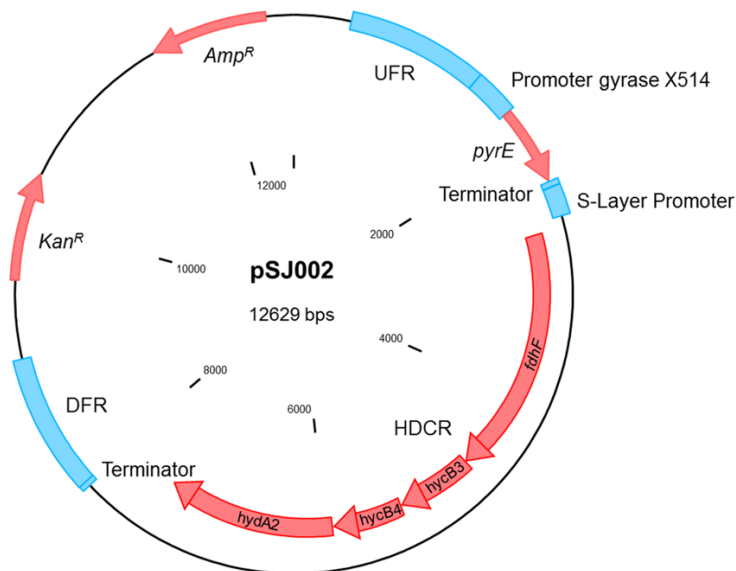

**Supplementary Figure 2.** Plasmid pSJ002. UFR, upstream flanking region; DFR, downstream flanking region; HDCR, genome region encoding the hydrogen-dependent carbon dioxide reductase; Promoter gyrase X514, putative promoter region of the gene encoding gyrase in *Thermoanaerobacter* sp. strain X514; S-layer promoter, putative promoter of the gene encoding the S-layer protein in *Thermoanaerobacter kivui*.
